# Supplementary material
Source: publisher figshare collection journal article supplement (https://sage.figshare.com/ndownloader/files/18120797)
Supplement: Supplementary file 1 [file 18120797]

**APPENDIX**

# PubMed

("allografts"[mesh] OR "bone transplantation"[mesh:noexp] OR "cancellous bone"[mesh] OR "polyetheretherketone" [supplementary concept] OR "auto bone"[tw] OR "auto bones"[tw] OR "autobone"[tw] OR "autobones"[tw] OR "autograft"[tw] OR "autografted"[tw] OR "autografting"[tw] OR "autografts"[mesh] OR "autografts"[tw] OR "autologous bone graft"[tw] OR "autologous bone grafts"[tw] OR "autologous graft"[tw] OR "autologous grafts"[tw] OR "autologous transplant"[tw] OR "autologous transplantation"[tw] OR "autologous transplantations"[tw] OR "autologous transplants"[tw] OR "bone graft"[tw] OR "bone grafts"[tw] OR "bone matrice"[tw] OR "bone matrices"[tw] OR "bone matrix"[tw] OR "bone transplant"[tw] OR "bone transplants"[tw] OR "bone transplantation"[tw] OR "bone transplantations"[tw] OR "cancellous"[tw] OR "cancellated"[tw] OR "corticocancellous"[tw] OR "dbm"[tw] OR "grafton"[tw] OR "homologous transplant"[tw] OR "homologous transplantation"[tw] OR "homologous transplantations"[tw] OR "homologous transplants"[tw] OR "hydroxy apatite"[tw] OR "hydroxyapatite"[tw] OR "peek"[tw] OR poly ether ether ketone*[tw] OR poly ether ketone*[tw] OR polyether ether ketone*[tw] OR polyetheretherketone*[tw] OR polyetherketone*[tw] OR "trabecular"[tw] OR "titanium"[tw] OR allograft*[tw] OR bone transplant*[tw] OR homograft*[tw])

AND

("cage"[tw] OR "cages"[tw] OR "device"[tw] OR "devices"[tw] OR "implant"[tw] OR "implantation"[tw] OR "implantations"[tw] OR "implants"[tw] OR "instrumentation"[tw] OR "instrumentations"[tw] OR "intervertebral body fusion device"[tw] OR "intervertebral body fusion devices"[tw] OR "vertebral body fusion device"[tw] OR "vertebral body fusion devices"[tw] OR cage*[tw] OR device*[tw] OR graft*[tw] OR implant*[tw] OR interbody[tw] OR spacer*[tw])

AND

("cervical vertebrae"[mesh:noexp] OR "neck"[mesh:noexp] OR "c 2"[tw] OR "c 3"[tw] OR "c 4"[tw] OR "c 5"[tw] OR "c 6"[tw] OR "c 7"[tw] OR "c spinal"[tw] OR "c spine"[tw] OR "c2"[tw] OR "c3"[tw] OR "c4"[tw] OR "c5"[tw] OR "c6"[tw] OR "c7"[tw] OR "cervical"[tw] OR "neck"[tw])

AND
("diskectomy, percutaneous"[mesh] OR "diskectomy"[mesh] OR "spinal fusion"[mesh:noexp] OR "acdf"[tw] OR "anterior cervical discectomy and fusion"[tw] OR "anterior cervical diskectomy and fusion"[tw] OR "cervical fusion"[tw] OR "cervical fusions"[tw] OR discectom*[tw] OR diskectom*[tw] OR "fusion"[tw] OR "fusions"[tw])

NOT

("animals"[mesh] not ("animals"[mesh] and "humans"[mesh]))

1,922 results

# Embase

('allograft'/exp OR 'bone allograft'/exp OR 'bone transplantation'/exp OR 'bone graft'/exp OR 'trabecular bone'/exp OR 'polyetheretherketone'/exp OR 'auto bone':ti,ab,kw OR 'auto bones':ti,ab,kw OR 'autobone':ti,ab,kw OR 'autobones':ti,ab,kw OR 'autograft':ti,ab,kw OR 'autografted':ti,ab,kw OR 'autografting':ti,ab,kw OR 'autograft'/de OR 'autografts':ti,ab,kw OR 'autologous bone graft':ti,ab,kw OR 'autologous bone grafts':ti,ab,kw OR 'autologous graft':ti,ab,kw OR 'autologous grafts':ti,ab,kw OR 'autologous transplant':ti,ab,kw OR 'autologous transplantation':ti,ab,kw OR 'autologous transplantations':ti,ab,kw OR 'autologous transplants':ti,ab,kw OR 'bone graft':ti,ab,kw OR 'bone grafts':ti,ab,kw OR 'bone matrice':ti,ab,kw OR 'bone matrices':ti,ab,kw OR 'bone matrix':ti,ab,kw OR 'bone transplant':ti,ab,kw OR 'bone transplants':ti,ab,kw OR 'bone transplantation':ti,ab,kw OR 'bone transplantations':ti,ab,kw OR 'cancellous':ti,ab,kw OR 'cancellated':ti,ab,kw OR 'corticocancellous':ti,ab,kw OR 'dbm':ti,ab,kw OR 'grafton':ti,ab,kw OR 'homologous transplant':ti,ab,kw OR 'homologous transplantation':ti,ab,kw OR 'homologous transplantations':ti,ab,kw OR 'homologous transplants':ti,ab,kw OR 'hydroxy apatite':ti,ab,kw OR 'hydroxyapatite':ti,ab,kw OR 'peek':ti,ab,kw OR 'poly ether ether ketone*':ti,ab,kw OR 'poly ether ketone*':ti,ab,kw OR 'polyether ether ketone*':ti,ab,kw OR 'polyetheretherketone*':ti,ab,kw OR 'polyetherketone*':ti,ab,kw OR 'trabecular':ti,ab,kw OR 'titanium':ti,ab,kw OR allograft*:ti,ab,kw OR 'bone transplant*':ti,ab,kw OR homograft*:ti,ab,kw)

AND

('cage':ti,ab,kw OR 'cages':ti,ab,kw OR 'device':ti,ab,kw OR 'devices':ti,ab,kw OR 'implant':ti,ab,kw OR 'implantation':ti,ab,kw OR 'implantations':ti,ab,kw OR 'implants':ti,ab,kw OR 'instrumentation':ti,ab,kw OR 'instrumentations':ti,ab,kw OR 'intervertebral body fusion device':ti,ab,kw OR 'intervertebral body fusion devices':ti,ab,kw OR 'vertebral body fusion device':ti,ab,kw OR 'vertebral body fusion devices':ti,ab,kw OR cage*:ti,ab,kw OR device*:ti,ab,kw OR graft*:ti,ab,kw OR implant*:ti,ab,kw OR interbody:ti,ab,kw OR spacer*:ti,ab,kw)

AND

('cervical spine'/de OR 'cervical vertebra'/de OR 'neck'/de OR 'c 2':ti,ab,kw OR 'c 3':ti,ab,kw OR 'c 4':ti,ab,kw OR 'c 5':ti,ab,kw OR 'c 6':ti,ab,kw OR 'c 7':ti,ab,kw OR 'c spinal':ti,ab,kw OR 'c spine':ti,ab,kw OR 'c2':ti,ab,kw OR 'c3':ti,ab,kw OR 'c4':ti,ab,kw OR 'c5':ti,ab,kw OR 'c6':ti,ab,kw OR 'c7':ti,ab,kw OR 'cervical':ti,ab,kw OR 'neck':ti,ab,kw)

AND
('percutaneous discectomy'/de OR 'discectomy'/de OR 'spine fusion'/de OR 'anterior spine fusion'/de OR 'acdf':ti,ab,kw OR 'anterior cervical discectomy and fusion':ti,ab,kw OR 'anterior cervical diskectomy and fusion':ti,ab,kw OR 'cervical fusion':ti,ab,kw OR 'cervical fusions':ti,ab,kw OR discectom*:ti,ab,kw OR diskectom*:ti,ab,kw OR 'fusion':ti,ab,kw OR 'fusions':ti,ab,kw)

NOT

('animal'/de not ('animal'/de and 'human'/de))

2,587 results

# The Cochrane Library

([mh "allografts"] OR [mh ^"bone transplantation"] OR [mh "cancellous bone"] OR [mh "autografts"]OR "polyetheretherketone" OR "auto bone":ti,ab,kw OR "auto bones":ti,ab,kw OR "autobone":ti,ab,kw OR "autobones":ti,ab,kw OR "autograft":ti,ab,kw OR "autografted":ti,ab,kw OR "autografting":ti,ab,kw OR "autografts":ti,ab,kw OR "autologous bone graft":ti,ab,kw OR "autologous bone grafts":ti,ab,kw OR "autologous graft":ti,ab,kw OR "autologous grafts":ti,ab,kw OR "autologous transplant":ti,ab,kw OR "autologous transplantation":ti,ab,kw OR "autologous transplantations":ti,ab,kw OR "autologous transplants":ti,ab,kw OR "bone graft":ti,ab,kw OR "bone grafts":ti,ab,kw OR "bone matrice":ti,ab,kw OR "bone matrices":ti,ab,kw OR "bone matrix":ti,ab,kw OR "bone transplant":ti,ab,kw OR "bone transplants":ti,ab,kw OR "bone transplantation":ti,ab,kw OR "bone transplantations":ti,ab,kw OR "cancellous":ti,ab,kw OR "cancellated":ti,ab,kw OR "corticocancellous":ti,ab,kw OR "dbm":ti,ab,kw OR "grafton":ti,ab,kw OR "homologous transplant":ti,ab,kw OR "homologous transplantation":ti,ab,kw OR "homologous transplantations":ti,ab,kw OR "homologous transplants":ti,ab,kw OR "hydroxy apatite":ti,ab,kw OR "hydroxyapatite":ti,ab,kw OR "peek":ti,ab,kw OR "poly ether ether ketone":ti,ab,kw OR "poly ether ketone":ti,ab,kw OR "polyether ether ketone":ti,ab,kw OR "polyetheretherketone":ti,ab,kw OR "polyetherketone":ti,ab,kw OR "trabecular":ti,ab,kw OR "titanium":ti,ab,kw OR allograft*:ti,ab,kw OR "bone transplant*":ti,ab,kw OR homograft*:ti,ab,kw)

AND

("cage":ti,ab,kw OR "cages":ti,ab,kw OR "device":ti,ab,kw OR "devices":ti,ab,kw OR "implant":ti,ab,kw OR "implantation":ti,ab,kw OR "implantations":ti,ab,kw OR "implants":ti,ab,kw OR "instrumentation":ti,ab,kw OR "instrumentations":ti,ab,kw OR "intervertebral body fusion device":ti,ab,kw OR "intervertebral body fusion devices":ti,ab,kw OR "vertebral body fusion device":ti,ab,kw OR "vertebral body fusion devices":ti,ab,kw OR cage*:ti,ab,kw OR device*:ti,ab,kw OR graft*:ti,ab,kw OR implant*:ti,ab,kw OR interbody:ti,ab,kw OR spacer*:ti,ab,kw)

AND

([mh ^"cervical vertebrae"] OR [mh ^"neck"] OR "c 2":ti,ab,kw OR "c 3":ti,ab,kw OR "c 4":ti,ab,kw OR "c 5":ti,ab,kw OR "c 6":ti,ab,kw OR "c 7":ti,ab,kw OR "c spinal":ti,ab,kw OR "c spine":ti,ab,kw OR "c2":ti,ab,kw OR "c3":ti,ab,kw OR "c4":ti,ab,kw OR "c5":ti,ab,kw OR "c6":ti,ab,kw OR "c7":ti,ab,kw OR "cervical":ti,ab,kw OR "neck":ti,ab,kw)

AND
([mh "diskectomy, percutaneous"] OR [mh "diskectomy"] OR [mh ^"spinal fusion"] OR "acdf":ti,ab,kw OR "anterior cervical discectomy and fusion":ti,ab,kw OR "anterior cervical diskectomy and fusion":ti,ab,kw OR "cervical fusion":ti,ab,kw OR "cervical fusions":ti,ab,kw OR discectom*:ti,ab,kw OR diskectom*:ti,ab,kw OR "fusion":ti,ab,kw OR "fusions":ti,ab,kw)

237 results

- 3 Cochrane Reviews
- 234 Trials

# Web of Science

TS=("allografts" OR "bone transplantation" OR "cancellous bone" OR "polyetheretherketone" OR "auto bone" OR "auto bones" OR "autobone" OR "autobones" OR "autograft" OR "autografted" OR "autografting" OR "autografts" OR "autografts" OR "autologous bone graft" OR "autologous bone grafts" OR "autologous graft" OR "autologous grafts" OR "autologous transplant" OR "autologous transplantation" OR "autologous transplantations" OR "autologous transplants" OR "bone graft" OR "bone grafts" OR "bone matrice" OR "bone matrices" OR "bone matrix" OR "bone transplant" OR "bone transplants" OR "bone transplantation" OR "bone transplantations" OR "cancellous" OR "cancellated" OR "corticocancellous" OR "dbm" OR "grafton" OR "homologous transplant" OR "homologous transplantation" OR "homologous transplantations" OR "homologous transplants" OR "hydroxy apatite" OR "hydroxyapatite" OR "peek" OR "poly ether ether ketone" OR "poly ether ketone" OR "polyether ether ketone" OR "polyetheretherketone" OR "polyetherketone" OR "trabecular" OR "titanium" OR allograft* OR "bone transplant*" OR homograft*)

AND

TS=("cage" OR "cages" OR "device" OR "devices" OR "implant" OR "implantation" OR "implantations" OR "implants" OR "instrumentation" OR "instrumentations" OR "intervertebral body fusion device" OR "intervertebral body fusion devices" OR "vertebral body fusion device" OR "vertebral body fusion devices" OR cage* OR device* OR graft* OR implant* OR interbody OR spacer*)

AND

TS=("cervical vertebrae" OR "neck" OR "c 2" OR "c 3" OR "c 4" OR "c 5" OR "c 6" OR "c 7" OR "c spinal" OR "c spine" OR "c2" OR "c3" OR "c4" OR "c5" OR "c6" OR "c7" OR "cervical" OR "neck")

AND
TS=("diskectomy" OR "spinal fusion" OR "acdf" OR "anterior cervical discectomy and fusion" OR "anterior cervical diskectomy and fusion" OR "cervical fusion" OR "cervical fusions" OR discectom* OR diskectom* OR "fusion" OR "fusions")

1,959 results

# Scopus

TITLE-ABS-KEY("allografts" OR "bone transplantation" OR "cancellous bone" OR "polyetheretherketone" OR "auto bone" OR "auto bones" OR "autobone" OR "autobones" OR "autograft" OR "autografted" OR "autografting" OR "autografts" OR "autografts" OR "autologous bone graft" OR "autologous bone grafts" OR "autologous graft" OR "autologous grafts" OR "autologous transplant" OR "autologous transplantation" OR "autologous transplantations" OR "autologous transplants" OR "bone graft" OR "bone grafts" OR "bone matrice" OR "bone matrices" OR "bone matrix" OR "bone transplant" OR "bone transplants" OR "bone transplantation" OR "bone transplantations" OR "cancellous" OR "cancellated" OR "corticocancellous" OR "dbm" OR "grafton" OR "homologous transplant" OR "homologous transplantation" OR "homologous transplantations" OR "homologous transplants" OR "hydroxy apatite" OR "hydroxyapatite" OR "peek" OR "poly ether ether ketone" OR "poly ether ketone" OR "polyether ether ketone" OR "polyetheretherketone" OR "polyetherketone" OR "trabecular" OR "titanium" OR allograft* OR "bone transplant*" OR homograft*)

AND

TITLE-ABS-KEY("cage" OR "cages" OR "device" OR "devices" OR "implant" OR "implantation" OR "implantations" OR "implants" OR "instrumentation" OR "instrumentations" OR "intervertebral body fusion device" OR "intervertebral body fusion devices" OR "vertebral body fusion device" OR "vertebral body fusion devices" OR cage* OR device* OR graft* OR implant* OR interbody OR spacer*)

AND

TITLE-ABS-KEY("cervical vertebrae" OR "neck" OR "c 2" OR "c 3" OR "c 4" OR "c 5" OR "c 6" OR "c 7" OR "c spinal" OR "c spine" OR "c2" OR "c3" OR "c4" OR "c5" OR "c6" OR "c7" OR "cervical" OR "neck")

AND
TITLE-ABS-KEY("diskectomy" OR "spinal fusion" OR "acdf" OR "anterior cervical discectomy and fusion" OR "anterior cervical diskectomy and fusion" OR "cervical fusion" OR "cervical fusions" OR discectom* OR diskectom* OR "fusion" OR "fusions")

2,949 results

# CINAHL Plus

(MH "allografts" OR MH "bone transplantation" OR MH "cancellous bone" OR "polyetheretherketone" OR "auto bone" OR "auto bones" OR "autobone" OR "autobones" OR "autograft" OR "autografted" OR "autografting" OR MH "autografts" OR "autografts" OR "autologous bone graft" OR "autologous bone grafts" OR "autologous graft" OR "autologous grafts" OR "autologous transplant" OR "autologous transplantation" OR "autologous transplantations" OR "autologous transplants" OR "bone graft" OR "bone grafts" OR "bone matrice" OR "bone matrices" OR "bone matrix" OR "bone transplant" OR "bone transplants" OR "bone transplantation" OR "bone transplantations" OR "cancellous" OR "cancellated" OR "corticocancellous" OR "dbm" OR "grafton" OR "homologous transplant" OR "homologous transplantation" OR "homologous transplantations" OR "homologous transplants" OR "hydroxy apatite" OR "hydroxyapatite" OR "peek" OR poly ether ether ketone* OR poly ether ketone* OR polyether ether ketone* OR polyetheretherketone* OR polyetherketone* OR "trabecular" OR "titanium" OR allograft* OR bone transplant* OR homograft*)

AND

("cage" OR "cages" OR "device" OR "devices" OR "implant" OR "implantation" OR "implantations" OR "implants" OR "instrumentation" OR "instrumentations" OR "intervertebral body fusion device" OR "intervertebral body fusion devices" OR "vertebral body fusion device" OR "vertebral body fusion devices" OR cage* OR device* OR graft* OR implant* OR interbody OR spacer*)

AND

(MH "cervical vertebrae" OR MH "neck" OR "c 2" OR "c 3" OR "c 4" OR "c 5" OR "c 6" OR "c 7" OR "c spinal" OR "c spine" OR "c2" OR "c3" OR "c4" OR "c5" OR "c6" OR "c7" OR "cervical" OR "neck")

AND
(MH "diskectomy" OR MH "spinal fusion" OR "acdf" OR "anterior cervical discectomy and fusion" OR "anterior cervical diskectomy and fusion" OR "cervical fusion" OR "cervical fusions" OR discectom* OR diskectom* OR "fusion" OR "fusions")

407 results

# ClinicalTrials.gov

PEEK or polyetheretherketone

82 results
